# Supplementary material
Source: PubMed Central journal article supplement (PMC5821176)
Supplement: jciinsight-3-97732-s001.pdf [file jciinsight-3-97732-s001.pdf]

## SUPPLEMENTARY FIGURES

### Supplementary Figure 1.

EndoC- $\beta$ H1 cells were either mock-transfected (control) or transfected with PolyI:C and analyzed 24 hours later. **(A, B)** Heatmap from global transcriptomic analysis and RT-qPCR data represent up-regulated PRR genes (n=3). **(C)** Heatmap from global transcriptomic analysis indicating that PolyI:C treatment induces the expression of *B2M*. Data from RT-qPCR are the means  $\pm$  SD of 3 independent experiments (t-tests; \*\*p<0.01 and \*\*\*p<0.001 relative to control.)

### Supplementary Figure 2.

EndoC- $\beta$ H1 cells were either mock-transfected (control) or transfected with PolyI:C and analyzed 24 hours later.  $\beta$  cell disallowed genes (19, 20) from global transcriptomic analysis are listed (n=3; the means  $\pm$  SD of 3 independent experiments are listed)

### Supplementary Figure 3.

**(A-D)** EndoC- $\beta$ H1 cells were either mock-transfected (control) or transfected with PolyI:C. 24 hours later, cells were stained with Annexin-V and Propidium Iodide and FAC-sorted (A, B) (n=3; Representative FACS plot of 3 independent experiment is shown). RNAs were prepared from living Annexin-V<sup>neg</sup> / Propidium Iodide<sup>neg</sup> cells for RT-qPCR analysis (C, D). Data from FACS analyses and RT-qPCR are the means  $\pm$  SD of 3 independent experiments (t-tests; \*p<0.05, \*\*p<0.01 and \*\*\*p<0.001 relative to control.)

### Supplementary Figure 4.

EndoC- $\beta$ H1 cells were either mock-transfected (control) or transfected with PolyI:C and analyzed 24 hours later. Heatmap from global transcriptomic analysis represents a list of genes previously found up-regulated in CVB5-infected human islets (10, 21).

### **Supplementary Figure 5.**

EndoC- $\beta$ H1 cells were treated with PMA for 8 hours and RNAs were prepared for RT-qPCR analyses of *HES1*, *MYC*, *MAFA* and *SLC30A8* genes expression levels (A). EndoC- $\beta$ H1 cells were treated with PMA and/or PDTC for 8 hours. RNAs were prepared for RT-qPCR (B) and proteins for Western blot analyses (C).

Data from RT-qPCR and Western blot are the means  $\pm$  SD of 3 independent experiments (t-tests or ANOVA with Bonferroni's correction for multiple comparison; \* $p$ <0.05 and \*\*\* $p$ <0.001 relative to control.)

### **Supplementary Figure 6.**

(A) EndoC- $\beta$ H1 cells were treated for 72 hours with PolyI:C (1-50 $\mu$ g/ml) that was added (without transfection) in the culture medium. RNAs were prepared for RT-qPCR (n=3) (B) Conditioned medium from mock-transfected (CTRL) or PolyI:C-transfected EndoC- $\beta$ H1 cells was treated with or without RNase-A and added to naive EndoC- $\beta$ H1 cells. RNAs were prepared 72 hours later, for RT-qPCR (n=3).

Data from RT-qPCR represent the means  $\pm$  SD of 3 independent experiments (ANOVA with Bonferroni's correction; \*\*\* $p$ <0.001 relative to PolyI:C treatment.)

### **Supplementary Figure 7.**

(A) Scheme of the SOX9 constructs used for EndoC- $\beta$ H1 transfection. (B-C) SOX9 responsive elements were co-transfected with MCS-ires-GFP, SOX9WT-ires-GFP, VP16-ires-GFP or VP16-SOX9 $\Delta$ TAD-ires-GFP. Luciferase activity was measured 48h later (n=4).

Data from Luciferase assay represent the means  $\pm$  SD of 4 independent experiments (ANOVA with Bonferroni's correction; \*\* $p$ <0.01 and \*\*\* $p$ <0.001 relative to control.)

### **Supplementary Figure 8.**

Venn diagram with genes up-regulated (>2 fold) in EndoC- $\beta$ H1 cells treated with PolyI:C and following ectopic expression of SOX9/VP16-SOX9 $\Delta$ TAD and

orthologous genes up-regulated (>2 fold) in dedifferentiated  $\beta$  cells from NOD mice (28). In red: genes up-regulated by both PolyI:C and SOX9/VP16-SOX9 $\Delta$ TAD; In blue: genes up-regulated in NOD dedifferentiated  $\beta$  cells and by SOX9/VP16-SOX9 $\Delta$ TAD; In green: genes up-regulated in all three sets.

## Supplementary Table 1.

### Probes sequences

|                     | Forward Sequence (5'-->3') | Reverse Sequence (5'-->3') |
|---------------------|----------------------------|----------------------------|
| <i>ACTB</i>         | CTGTACGCCAACACAGTGCT       | GCTCAGGAGGAGCAATGATC       |
| <i>CTGF</i>         | CAAGGGCCTCTTCTGTGACTT      | GGTACACCGTACCACCGAAG       |
| <i>DDX58</i>        | TGACTGGACGTGGCAAACA        | CAGCAACTGAGGTGGCAATC       |
| <i>DEPTOR</i>       | CTTCTGACAGAGACGGCA         | CCGTCATCCTTTCTAAAGCGG      |
| <i>G6PC2</i>        | CCATGCCTTGAACAGTTCCC       | GCCAGATGGACTTCCTGGAC       |
| <i>HES1</i>         | GTCAACACGACACGGGATAAACC    | TTCCAGAATGTCGCTTCTCC       |
| <i>IFIH1</i>        | GCATGGAGGAGGAAGTGTGA       | CCAGTTTTCTTCTGCACAATCCT    |
| <i>IFNA2</i>        | AAACCCACAGCCTGGGTAGC       | CAGGGATGGTTTCAGCCTTTTGG    |
| <i>IFNB</i>         | GTTGAGAACCTCCTGGCTAATG     | GGTAATGCAGAATCCTCCATAATA   |
| <i>IL6</i>          | CCAGAGCTGTGCAGATGAGT       | GGGTCAGGGTGGTTATTGC        |
| <i>IL8</i>          | AAATCTGGCAACCCTAGTCTG      | GTGAGGTAAGATGGTGGCTAAT     |
| <i>INS</i>          | TGTCCTTCTGCCATGGCCCT       | TTCACAAAGGCTGCGGCTGG       |
| <i>INS pre-mRNA</i> | GTGAACCAACCTGTGCGG         | AGGGGCAGCAATGGGCAGTT       |
| <i>LRRTM2</i>       | CCAACCTCCCTGCGGACTATC      | GCAATCCATTGCGAGCCAA        |
| <i>MAFA</i>         | ATTCTGGAGAGCGAGAAGTGCCAA   | CGCCAGCTTCTCGTATTTCTCCTT   |
| <i>MAFB</i>         | CACCACCTGGAGAATGAGAAG      | TTCTCGCACTTGACCTTGTAG      |
| <i>MAML2</i>        | TGGGATAAACGGAGAGCAGC       | CATTGGGTCGCTTGCTGTTG       |
| <i>MYC</i>          | GTAGTGGAACCAGCAGCC         | AGAAATACGGCTGCACCGAG       |
| <i>NEUROD1</i>      | ATTGCACCAGCCCTTCTTTGATG    | TCGCTGCAGGATAGTGCATGGTAA   |
| <i>NKX6-1</i>       | GAAGAGGACGACGACTACAATAAG   | CTGCTGGACTTGCTTCT          |
| <i>PDX1</i>         | TACTGGATTGGCGTTGTTGTGGC    | AGGGAGCCTTCCAATGTGTATGGT   |
| <i>PPIA</i>         | ATGGCAAATGCTGGACCAACA      | ACATGCTTGCCATCCAACCACT     |
| <i>RELA</i>         | TGAGCCACAAAGCCTTATC        | ACAATGCCAGTGCCATACA        |
| <i>SLC2A2</i>       | AGCTGCATTGAGCAATTGGACCTG   | ATGTGAACAGGGTAAAGGCCAGGA   |
| <i>SLC30A8</i>      | ACAGCCAAGTGGTTCGGAGAGAAA   | TTGGGAACTGACGGTGTGACTGA    |
| <i>SOX9</i>         | TTCACCTACATGAACCCCGC       | AAGGTCGAGTGTGCTGTGTG       |
| <i>TLR3</i>         | GCGCTAAAAAGTGAAGAACTGGA    | TTGCGTGAAAACACCCTGGA       |
| <i>TNFA</i>         | GATCCCTGACATCTGGAATCTG     | GAAACATCTGGAGAGAGGAAGG     |

# Supplementary Figure 1.

A

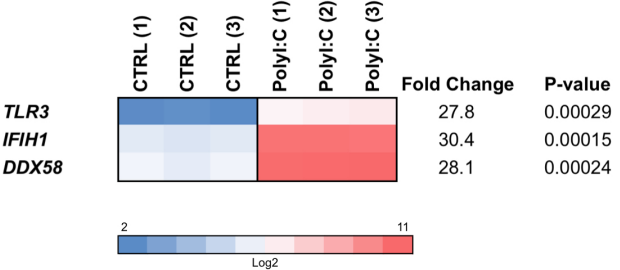

B

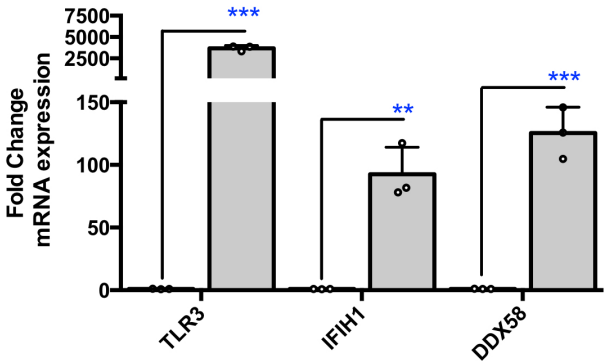

C

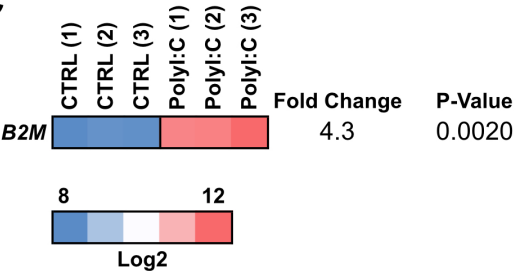

**Supplementary Figure 1.**

EndoC-βH1 cells were either mock-transfected (control) or transfected with PolyI:C and analyzed 24 hours later. **(A, B)** Heatmap from global transcriptomic analysis and RT-qPCR data represent up-regulated PRR genes (n=3). **(C)** Heatmap from global transcriptomic analysis indicating that PolyI:C treatment induces the expression of *B2M*. Data from RT-qPCR are the means ± SD of 3 independent experiments (t-tests; \*\*p<0.01 and \*\*\*p<0.001 relative to control.)

# Supplementary Figure 2.

|                | Fold Change     | P-Value |
|----------------|-----------------|---------|
|                | PolyI:C vs CTRL |         |
| <i>LRIG3</i>   | 4.04 (±0.28)    | 0.0002  |
| <i>LMO4</i>    | 2.28 (±0.04)    | 0.0003  |
| <i>TPM2</i>    | 1.74 (±0.27)    | 0.0206  |
| <i>DAPK2</i>   | 1.65 (±0.35)    | 0.0022  |
| <i>GAREM</i>   | 1.45 (±0.17)    | 0.0104  |
| <i>RPL36</i>   | 1.37 (±0.51)    | 0.0839  |
| <i>ZCCHC24</i> | 1.27 (±0.26)    | 0.0598  |
| <i>PLEC1</i>   | 1.23 (±0.15)    | 0.0605  |
| <i>ACOT7</i>   | 1.19 (±0.12)    | 0.0526  |
| <i>SMOC2</i>   | 1.18 (±0.35)    | 0.2214  |
| <i>ITIH5</i>   | 1.12 (±0.13)    | 0.1191  |
| <i>FAM13A</i>  | 1.12 (±0.19)    | 0.1886  |
| <i>IGFBP4</i>  | 1.09 (±0.05)    | 0.0331  |
| <i>SLC16A1</i> | 1.07 (±0.19)    | 0.2753  |
| <i>MGLL</i>    | 1.04 (±0.20)    | 0.3655  |
| <i>ZDHHC9</i>  | 1.02 (±0.03)    | 0.1641  |
| <i>COX5A</i>   | 1.01 (±0.15)    | 0.4252  |
| <i>NFIB</i>    | 1.01 (±0.02)    | 0.2103  |
| <i>HPGD</i>    | 1.00 (±0.06)    | 0.4011  |
| <i>MGST1</i>   | 1.00 (±0.09)    | 0.4553  |
| <i>RARRES2</i> | 0.98 (±0.15)    | 0.4350  |
| <i>TGM2</i>    | 0.96 (±0.03)    | 0.1435  |
| <i>HSD11B1</i> | 0.96 (±0.04)    | 0.1229  |
| <i>GAS6</i>    | 0.94 (±0.03)    | 0.0331  |
| <i>PDGFRA</i>  | 0.91 (±0.18)    | 0.2788  |
| <i>YAP1</i>    | 0.91 (±0.12)    | 0.1761  |
| <i>LDHA</i>    | 0.88 (±0.19)    | 0.2256  |
| <i>NDRG2</i>   | 0.87 (±0.08)    | 0.0691  |
| <i>IGF1</i>    | 0.85 (±0.00)    | 0.0001  |
| <i>TRF</i>     | 0.84 (±0.07)    | 0.0383  |
| <i>RASGRP2</i> | 0.84 (±0.13)    | 0.1075  |
| <i>TST</i>     | 0.80 (±0.05)    | 0.0118  |
| <i>GAS1</i>    | 0.80 (±0.14)    | 0.0771  |
| <i>OLFML1</i>  | 0.73 (±0.14)    | 0.0566  |
| <i>FCGRT</i>   | 0.66 (±0.14)    | 0.0406  |

## Supplementary Figure 2.

EndoC-βH1 cells were either mock-transfected (control) or transfected with PolyI:C and analyzed 24 hours later. β cell disallowed genes (19, 20) from global transcriptomic analysis are listed (n=3; the means ± SD of 3 independent experiments are listed)

# Supplementary Figure 3.

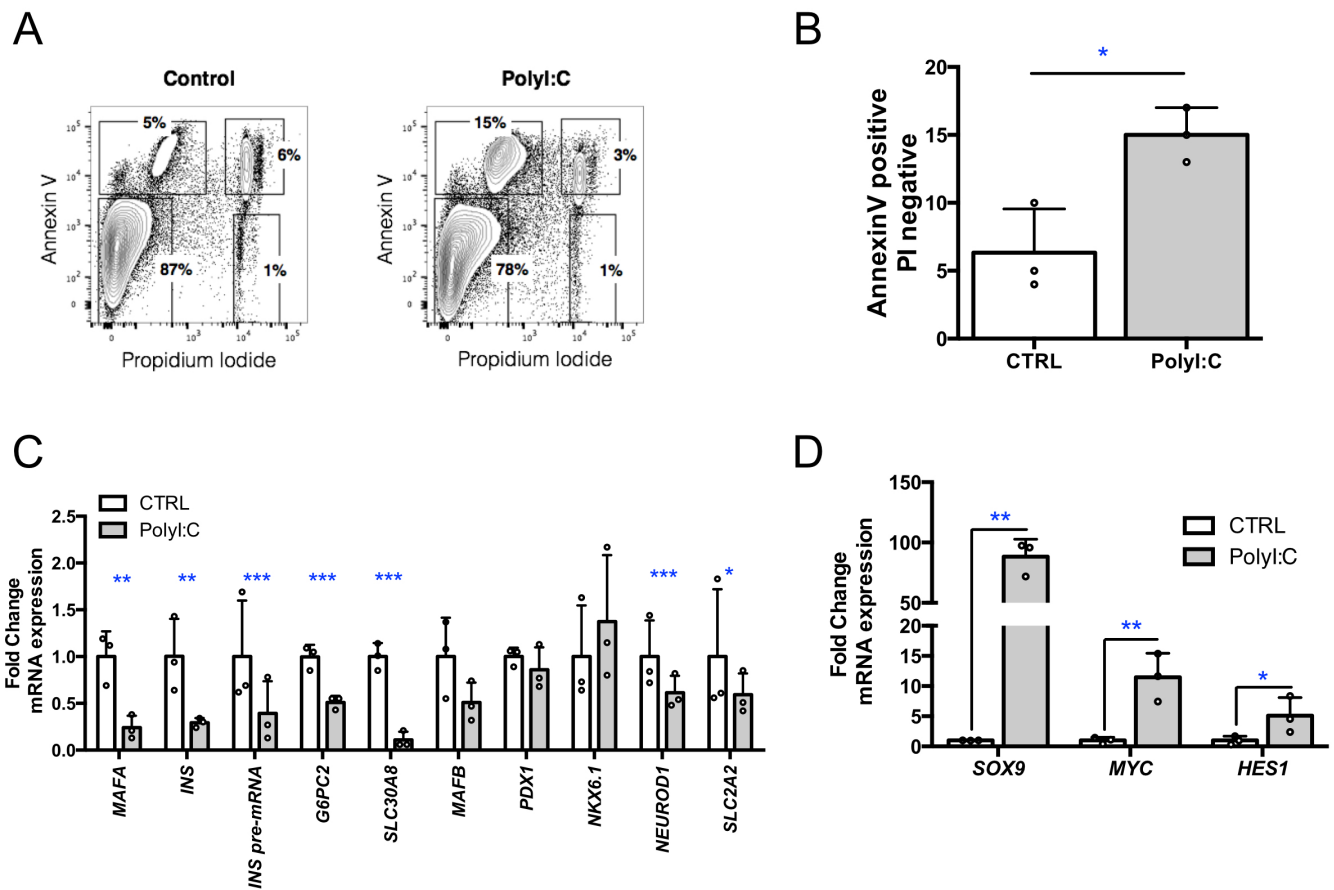

**Supplementary Figure 3.**

(A-D) EndoC-βH1 cells were either mock-transfected (control) or transfected with PolyI:C. 24 hours later, cells were stained with Annexin-V and Propidium Iodide and FAC-sorted (A, B) (n=3; Representative FACS plot of 3 independent experiment is shown). RNAs were prepared from living Annexin-V<sup>neg</sup> / Propidium Iodide<sup>neg</sup> cells for RT-qPCR analysis (C, D). Data from FACS analyses and RT-qPCR are the means ± SD of 3 independent experiments (t-tests; \*p<0.05, \*\*p<0.01 and \*\*\*p<0.001 relative to control.)

# Supplementary Figure 4.

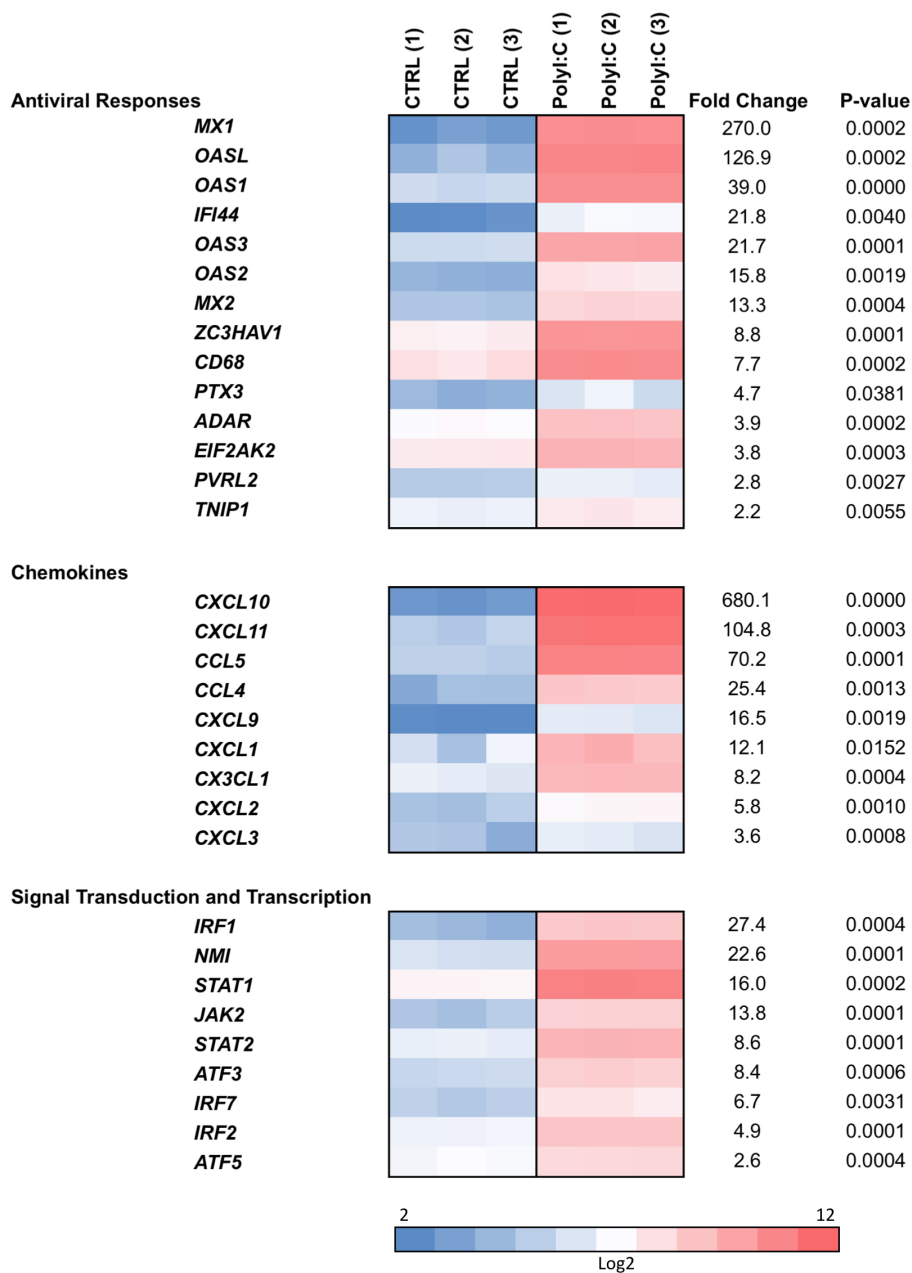

**Supplementary Figure 4.**

EndoC-βH1 cells were either mock-transfected (control) or transfected with PolyI:C and analyzed 24 hours later. Heatmap from global transcriptomic analysis represents a list of genes previously found up-regulated in CVB5-infected human islets (10, 21).

# Supplementary Figure 5.

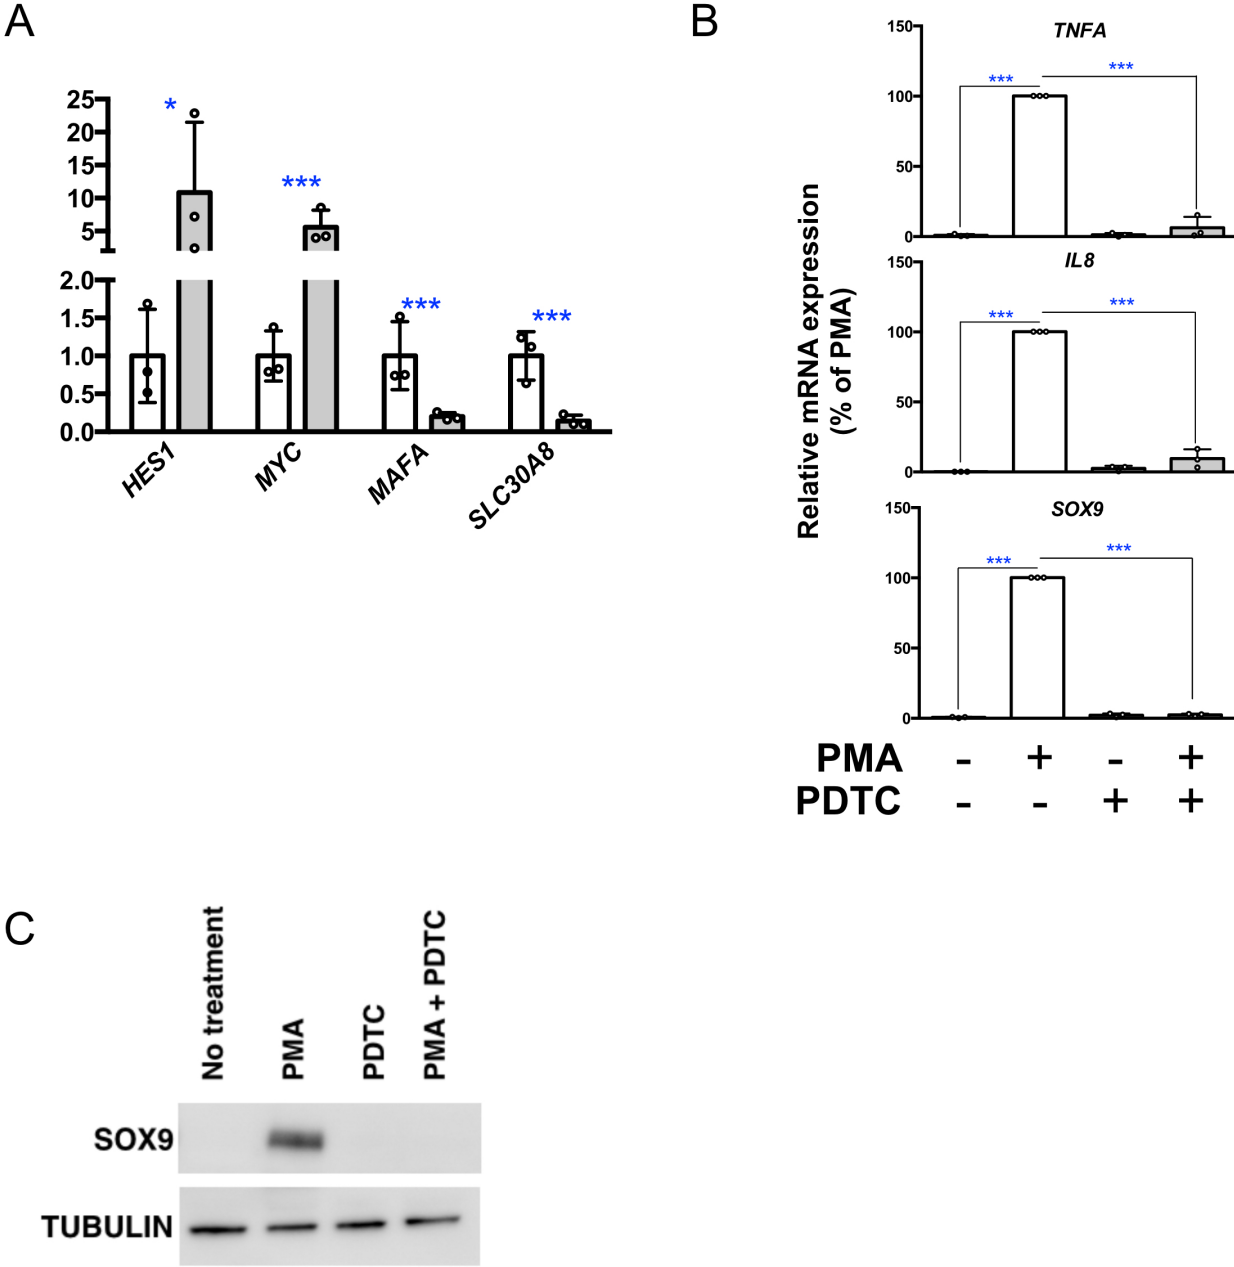

**Supplementary Figure 5.**

EndoC-βH1 cells were treated with PMA for 8 hours and RNAs were prepared for RT-qPCR analyses of *HES1*, *MYC*, *MAFA* and *SLC30A8* genes expression levels (A). EndoC-βH1 cells were treated with PMA and/or PDTC for 8 hours. RNAs were prepared for RT-qPCR (B) and proteins for Western blot analyses (C).

Data from RT-qPCR and Western blot are the means ± SD of 3 independent experiments (t-tests or ANOVA with Bonferroni's correction for multiple comparison; \* $p < 0.05$  and \*\*\* $p < 0.001$  relative to control.)



# Supplementary Figure 6.

A

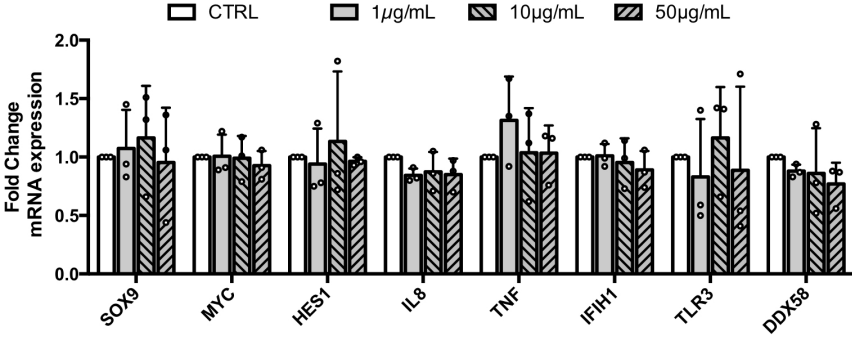

B

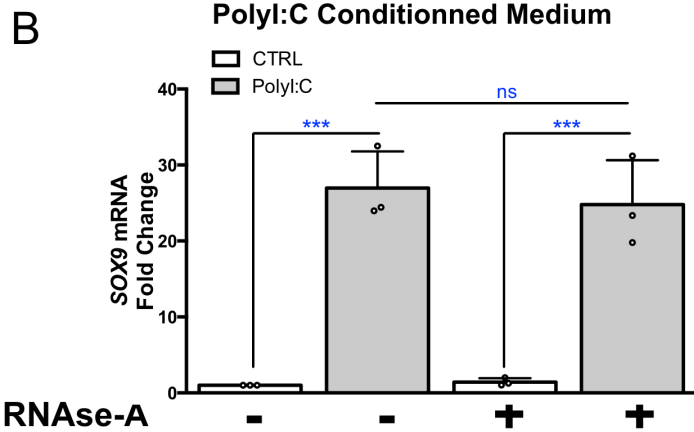

**Supplementary Figure 6.**

(A) EndoC-βH1 cells were treated for 72 hours with PolyI:C (1-50µg/ml) that was added (without transfection) in the culture medium. RNAs were prepared for RT-qPCR (n=3) (B) Conditioned medium from mock-transfected (CTRL) or PolyI:C-transfected EndoC-βH1 cells was treated with or without RNase-A and added to naive EndoC-βH1 cells. RNAs were prepared 72 hours later, for RT-qPCR (n=3).

Data from RT-qPCR represent the means ± SD of 3 independent experiments (ANOVA with Bonferroni's correction; \*\*\*p<0.001 relative to PolyI:C treatment.)

# Supplementary Figure 7.

A

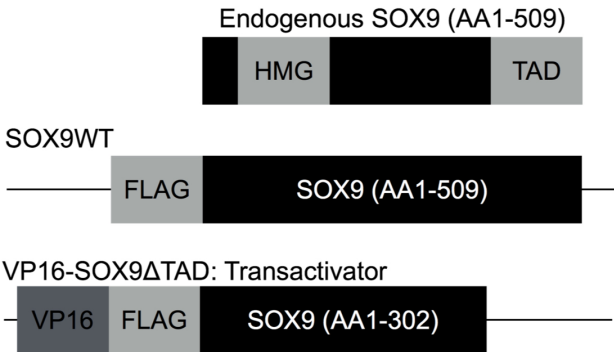

B

SOX9 responsive element activity (*Col2A1* promoter)

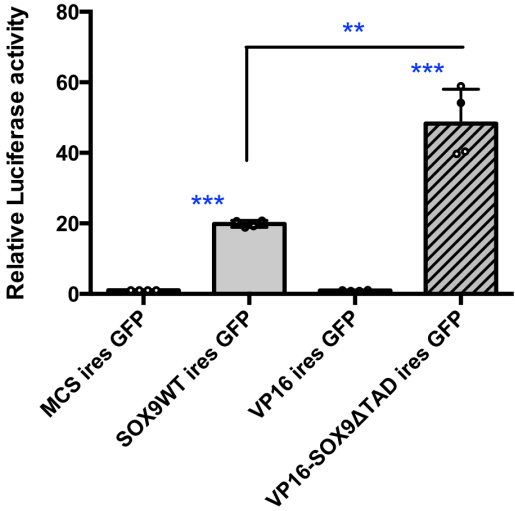

C

SOX9 responsive element activity (SOX9 binding motif)

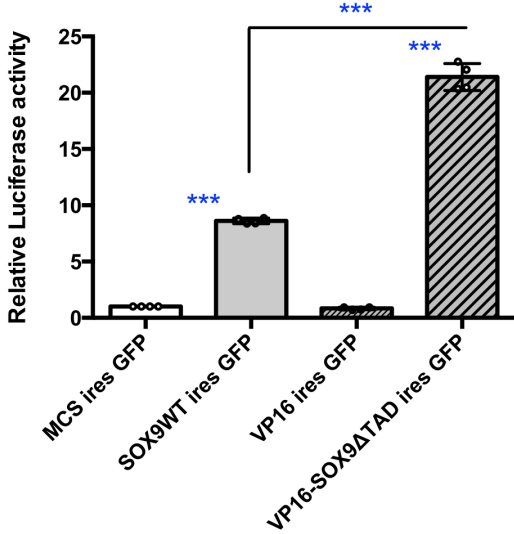

Supplementary Figure 7.

(A) Scheme of the SOX9 constructs used for EndoC-βH1 transfection. (B-C) SOX9 responsive elements were co-transfected with MCS-ires-GFP, SOX9WT-ires-GFP, VP16-ires-GFP or VP16-SOX9ΔTAD-ires-GFP. Luciferase activity was measured 48h later (n=4). Data from Luciferase assay represent the means ± SD of 4 independent experiments (ANOVA with Bonferroni's correction; \*\*p<0.01 and \*\*\*p<0.001 relative to control.)

# Supplementary Figure 8.

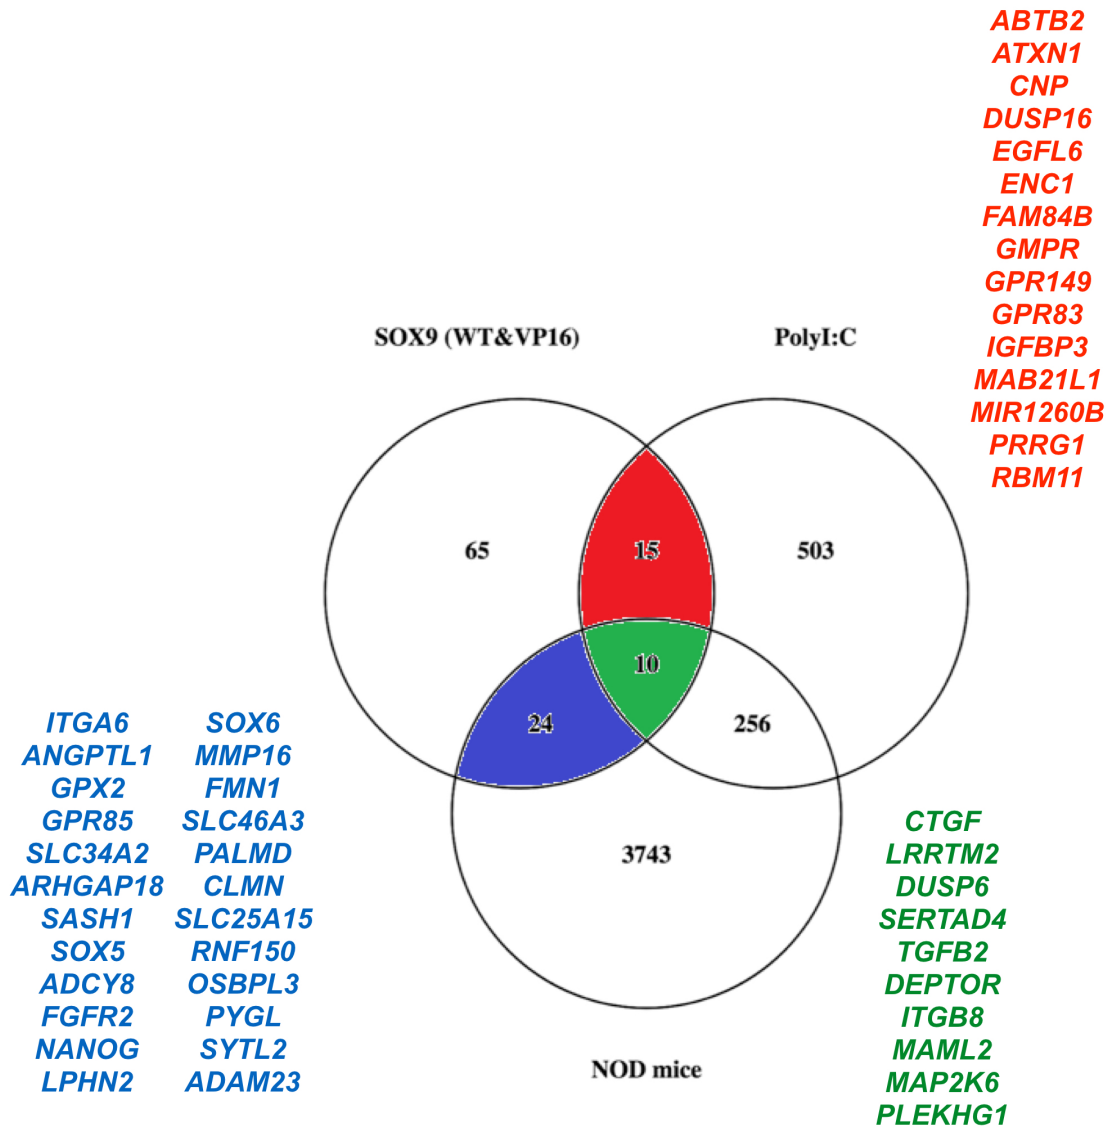

**Supplementary Figure 8.**

Venn diagram with genes up-regulated (>2 fold) in EndoC-βH1 cells treated with PolyI:C and following ectopic expression of SOX9/VP16-SOX9ΔTAD and orthologous genes up-regulated (>2 fold) in dedifferentiated β cells from NOD mice (28). In red: genes up-regulated by both PolyI:C and SOX9/VP16-SOX9ΔTAD; In blue: genes up-regulated in NOD dedifferentiated β cells and by SOX9/VP16-SOX9ΔTAD; In green: genes up-regulated in all three sets.
